# Supplementary material
Source: PubMed Central journal article supplement (PMC2655250)

## Supplemental data

**Figure S1.** Confocal section of an eye disc stained for endocytosed antibodies and endogenous Delta.

Antibodies against the extracellular domain of Delta (blue) were internalized by live eye discs for 20 min. Subsequently, discs were fixed and permeabilized and the location of internalized antibodies was compared to that of total Delta detected by antibodies against its intracellular domain (red). Arrowheads point to examples of antibodies internalized into the large Delta-positive compartments in *car*<sup>Δ146</sup> cells.

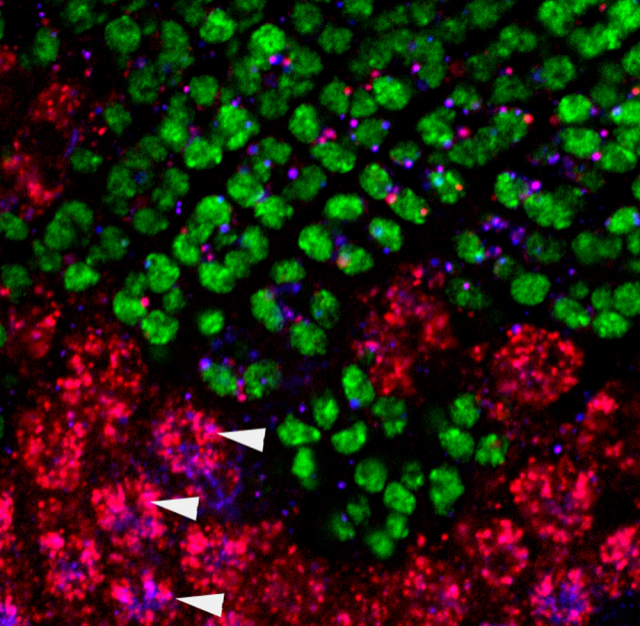

Supplement: E08-03-0282_1.pdf [file E08-03-0282_1.pdf]
